# Supplementary material for: Mitigating oil spills in the water column
Source: Royal Society of Chemistry journal article supplement (doi:10.1039/c7ew00265c), 2017-10-05
Supplement: c7ew00265c4.pdf [file c7ew00265c4.pdf]

## **Supplementary Materials for Mitigating Oil Spills in the Water Column**

Edward Barry,<sup>1,2</sup> Joseph A. Libera,<sup>2</sup> Anil U. Mane,<sup>2</sup> Jason R. Avila,<sup>2</sup> David DeVitis,<sup>3</sup>  
Keith Van Dyke,<sup>3</sup> Jeffrey W. Elam,<sup>2\*</sup> and Seth B. Darling<sup>1,4\*</sup>

<sup>1</sup> Nanoscience & Technology Division, Argonne National Laboratory, Argonne, IL  
60439 USA

<sup>2</sup> Energy Systems Division, Argonne National Laboratory, Argonne, IL 60439 USA

<sup>3</sup> National Oil Spill Response Research & Renewable Energy Test Facility (Ohmsett),  
Leonardo, NJ 07737 USA

<sup>4</sup> Institute for Molecular Engineering, University of Chicago, Chicago, IL 60637 USA

correspondence to: [darling@anl.gov](mailto:darling@anl.gov)

### **This PDF file includes:**

Figs. S1 to S6

Tables S1 to S5

Captions for Movies S1 to S3

### **Other Supplementary Materials for this manuscript includes the following:**

Movies S1 to S3

The tabulated data (see Table S2-S5) provide the following information:

Column 1 – **Test Number and Type** – test index number and type of sorbent examined

Column 2 – **Row/Sample** – Sorbent pads of identical composition in each row were processed and analyzed together. Data listed in the subsequent columns is the cumulative amounts obtained in that particular row.

Column 3 – **# of Foam Pads in each Row** – The number of foam pads contained in each row. For reference, the position of the untreated pad remained fixed in the second row for all tests.

Column 4 / 5 – **Volume of Water/Oil Collected** – The amount of each fluid recovered after wringing the pads.

Column 6 – **Oil Selectivity Ratio** – The fraction of oil, relative to the total amount of fluid collected during the wringing step.

#### Supplementary Figures:

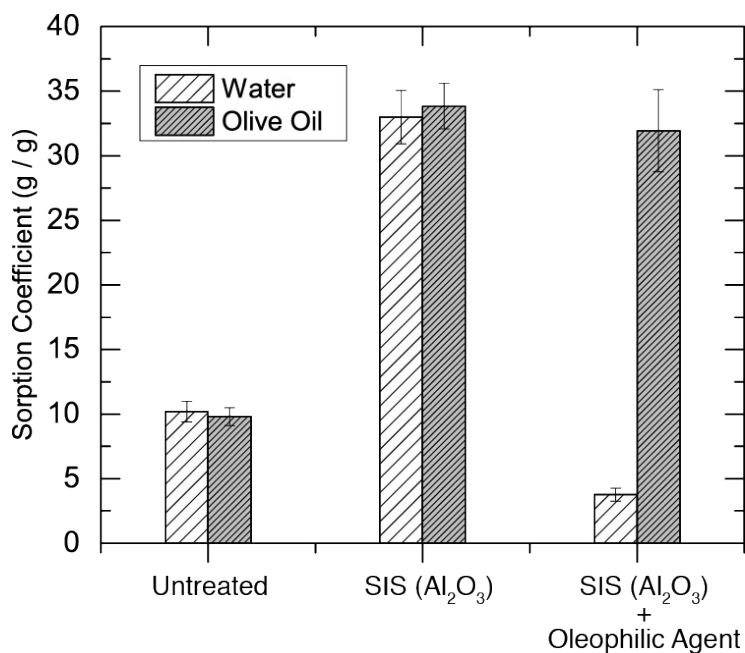

**Fig. S1. Pure solvent adsorption under standard conditions.** Sorption coefficient for untreated polyurethane foam (left), SIS-treated foam (middle), and SIS/oleophilic-treated foam (right) as measured using 1” foam cubes in the pure liquids.

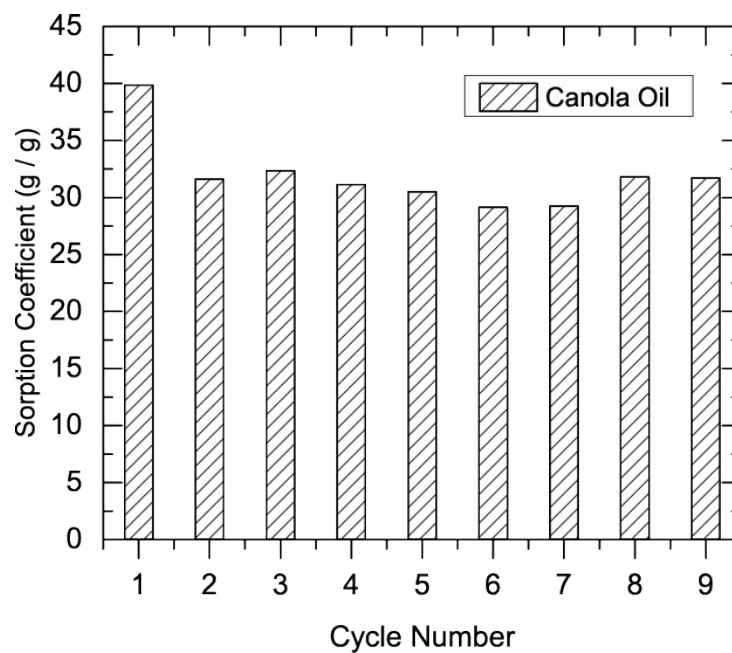

**Fig. S2. Reusability.** Sorption coefficient for the PU-T as measured over repeated sorption/desorption cycles in a bath of pure canola oil using 1" foam cubes.

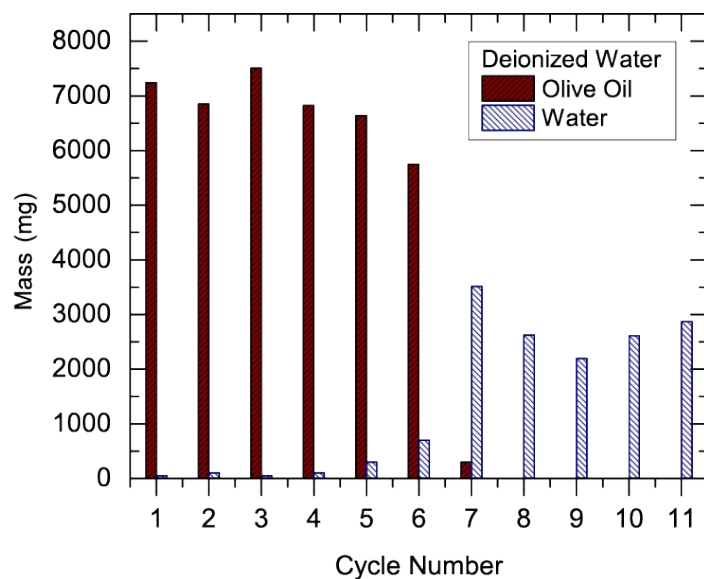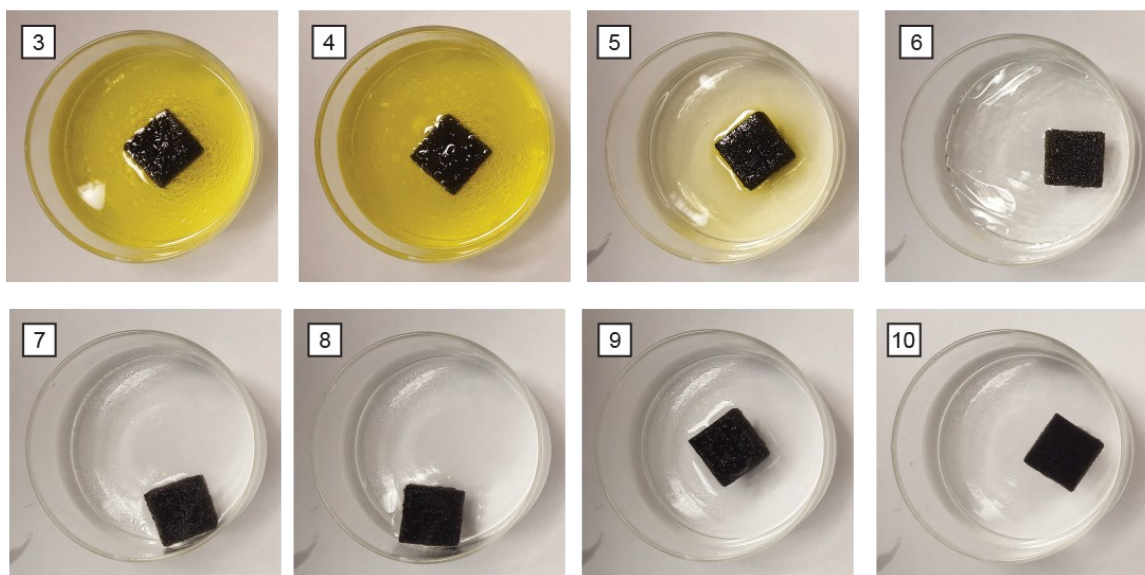

**Fig. S3. Oil to water selectivity.** The vessel is initially filled with water and a defined amount of olive oil that floats on the top. The amounts of oil and water adsorbed during each testing cycle are measured and shown in the bar graph. Each cycle consisted of placing the foam onto the surface of the liquid and leaving it for sufficient time to saturate with sorbed fluid, then compressing the sorbed fluid into a separate container.

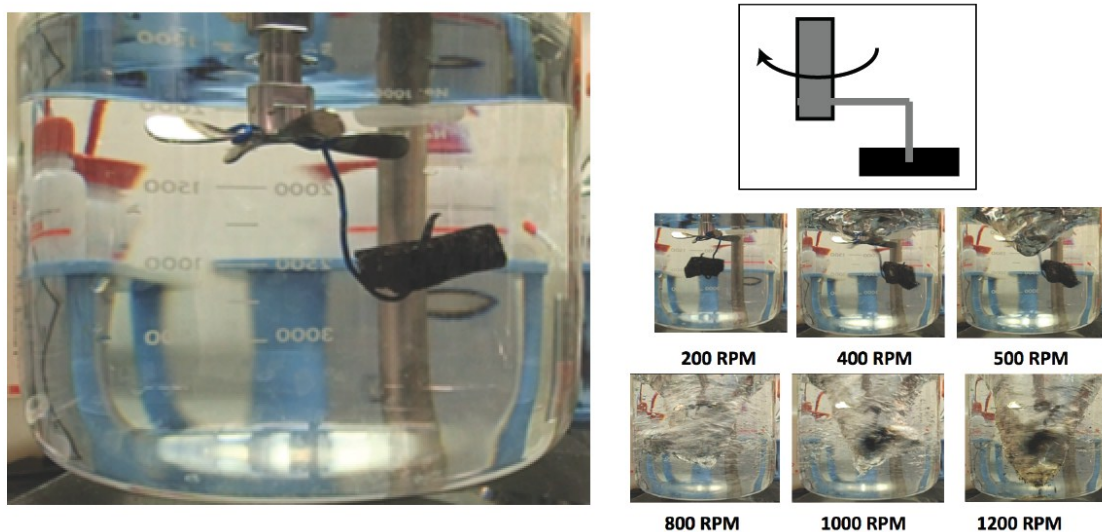

**Fig. S4. Oil Saturated Foam on Spinning Rotor**

These experiments investigated how mechanical perturbation (such as those encountered during ocean currents or when the foam is being transported by a trawler) would affect the ability for adsorbed oil to stay within the foam. Oil-saturated foam was loaded onto a rotor as shown above, and the behavior for various rotor speeds recorded. Sorbed oil was retained in the foam at rotational speeds up to 1000 RPM. As shown, 1" square cross-section of foam, and ½" thick. The foam was held in place by a paper clip attached to the rotor. ANS crude oil was adsorbed onto the foam at its saturating limit.

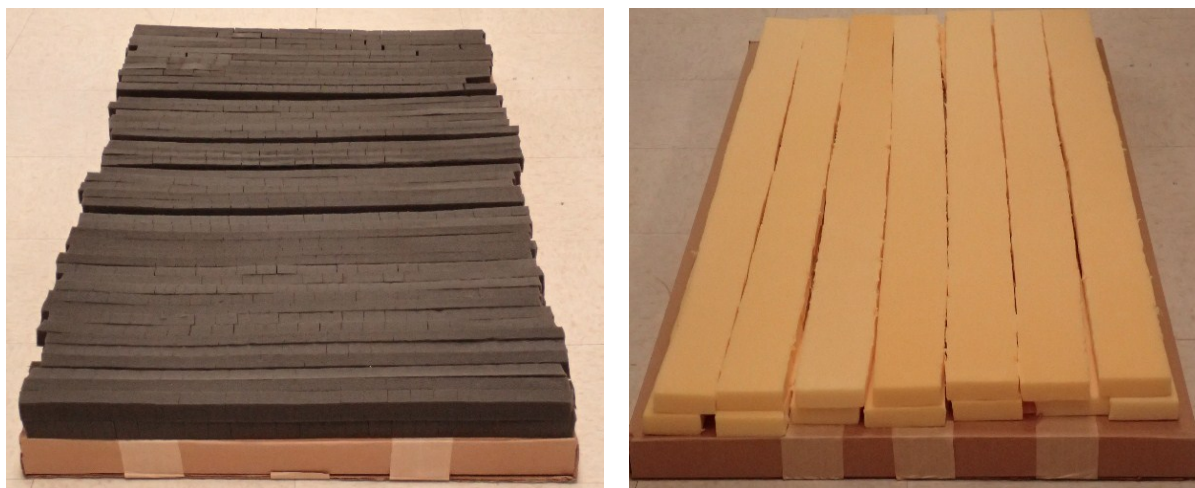

**Fig. S5. Foam scale-up.** Image showing the scaled-up production of foam, 1" × 1" × 24" strands of polyurethane (left) and ~3" × 1" × 48" strands of polyimide (right). As shown, there are 2× layers of 8 ft<sup>2</sup> (2 ft × 4 ft) of foam.

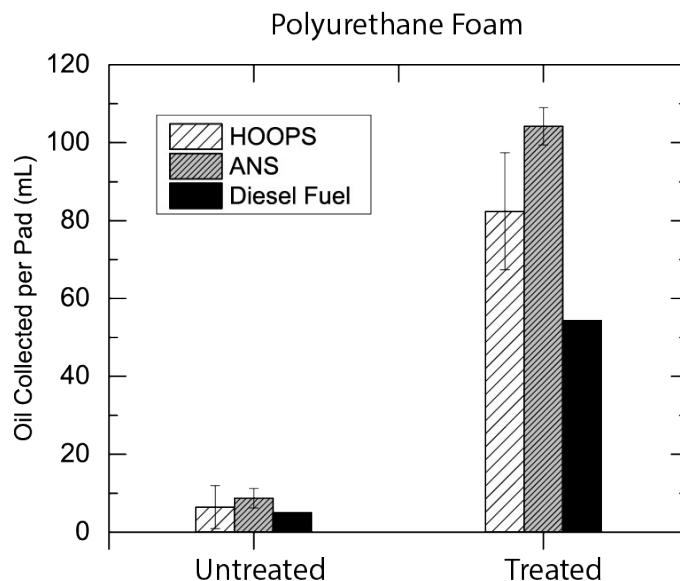

**Fig. S6. Water Column Sorption Comparison of PU-U / PU-T.** Water-column adsorption tests, showing the amount of oil collected per pad for untreated (PU-U) and SIS/oleophilic treated polyurethane (PU-T) foams, left and right, respectively. Values for HOOPS crude oil testing averaged over 7 independent tests and ANS over 4 different tests. Diesel fuel was measured in 1 test.

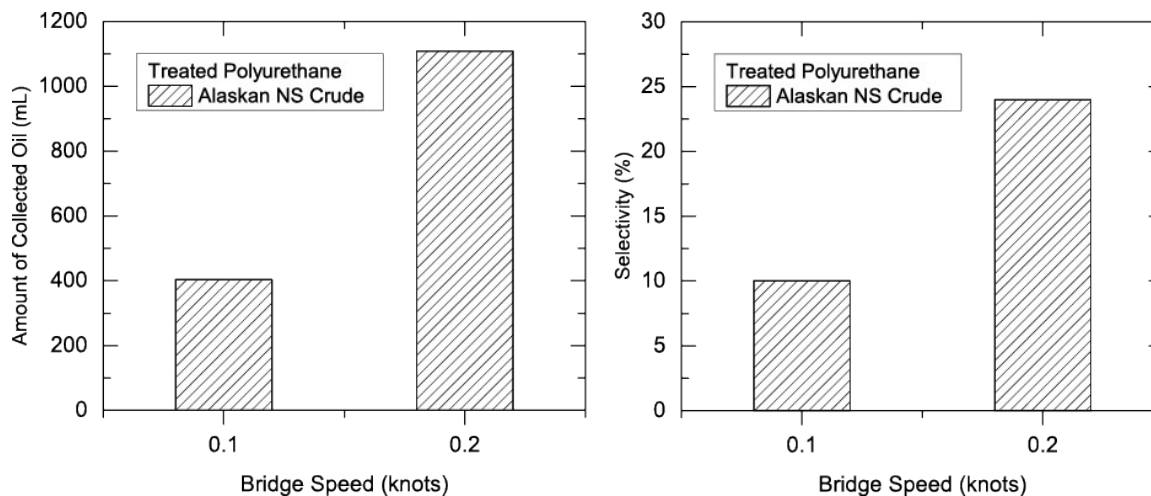

**Fig. S7. Bridge Speed.** The total amount of oil collected by PU-T foam pads (left) and selectivity of oil to water (right) are plotted as a function of bridge speed.

**Table S1.** Pure oil sorption capacity measurements.

| <b>Pure oil</b> |             | <b>Mass of foam pad</b> |                    | <b>Sorption capacity</b> |                         |
|-----------------|-------------|-------------------------|--------------------|--------------------------|-------------------------|
| Foam index      | Oil type    | Total<br>(lbs)          | Foam only<br>(lbs) | No drainage<br>(lbs)     | After drainage<br>(lbs) |
| Foam 1          | Canola      | 0.91                    | 0.49               | 13.39                    | 10.57                   |
| Foam 2          | Canola      | 0.92                    | 0.50               | 17.76                    | 14.96                   |
| Foam 3          | Canola      | 0.99                    | 0.57               | 13.30                    | 8.27                    |
| Foam 5          | HOOPS       | 0.89                    | 0.47               | 13.85                    | 11.94                   |
| Foam 4          | Diesel fuel | 0.93                    | 0.51               | 13.85                    | 10.40                   |

**Table S2.**

See materials and methods for a description of terms and column/row values.

| Test Number and Type            | Row/Sample | Number of Foam Pads in each Row | Total Volume Collected (Oil+Water) (mL) | Volume of Oil Collected (mL) | Selectivity Ratio of Oil to Total Volume (%) | Testing Parameters            |                            |                 |
|---------------------------------|------------|---------------------------------|-----------------------------------------|------------------------------|----------------------------------------------|-------------------------------|----------------------------|-----------------|
| Test 1<br>HOOPS<br>Polyurethane | 1          | 4                               | 3465                                    | 223.2                        | 6.4                                          | Oil Type                      | HOOPS                      |                 |
|                                 |            | 2                               | 3                                       | 2425                         | 315.3                                        | 13.0                          | Ohmsett Test Number / Date | 12.06 - Test 8  |
|                                 |            | 3                               | 4                                       | 3140                         | 582                                          | 18.5                          | Speed (knots)              | 0.1             |
|                                 |            | 4                               | 2                                       | 1350                         | 175.8                                        | 13.0                          | Bridge Spacing (feet)      | 13              |
|                                 |            | Untreated -PU                   | 1                                       | 820                          | 10                                           | 1.2                           | Post Oil Drag              | 0'              |
|                                 |            |                                 |                                         |                              |                                              |                               | Nozzle Configuration       | 8 x .042"       |
|                                 |            |                                 |                                         |                              |                                              | Duration (min)                | 3.92                       |                 |
|                                 |            |                                 |                                         |                              |                                              | Flow Rate (gpm)               | 1.38                       |                 |
|                                 |            |                                 |                                         |                              |                                              | Pump Pressure (psi)           | 80                         |                 |
|                                 |            |                                 |                                         |                              |                                              | Tank Initial / Final (inches) | 2.282 / 2.131              |                 |
|                                 |            |                                 |                                         |                              |                                              | Total                         | Treated - PU               | 13              |
|                                 |            |                                 |                                         |                              |                                              |                               |                            |                 |
| Test 2<br>HOOPS<br>Polyurethane | 1          | 4                               | 3125                                    | 244.4                        | 7.8                                          | Oil Type                      | HOOPS                      |                 |
|                                 |            | 2                               | 3                                       | 2230                         | 215                                          | 9.6                           | Ohmsett Test Number / Date | 12.06 - Test 9  |
|                                 |            | 3                               | 4                                       | 2150                         | 210                                          | 9.8                           | Speed (knots)              | .1 to .12       |
|                                 |            | 4                               | 2                                       | 900                          | 62.3                                         | 6.9                           | Bridge Spacing (feet)      | 10              |
|                                 |            | Untreated -PU                   | 1                                       | 750                          | 5                                            | 0.7                           | Post Oil Drag              | 100'            |
|                                 |            |                                 |                                         |                              |                                              |                               | Nozzle Configuration       | 6 x .042"       |
|                                 |            |                                 |                                         |                              |                                              | Duration (min)                | 10.58                      |                 |
|                                 |            |                                 |                                         |                              |                                              | Flow Rate (gpm)               | 1.13                       |                 |
|                                 |            |                                 |                                         |                              |                                              | Pump Pressure (psi)           | 80                         |                 |
|                                 |            |                                 |                                         |                              |                                              | Tank Initial / Final (inches) | 2.111 / 1.776              |                 |
|                                 |            |                                 |                                         |                              |                                              | Total                         | Treated - PU               | 13              |
|                                 |            |                                 |                                         |                              |                                              |                               |                            |                 |
| Test 3<br>HOOPS<br>Polyurethane | 1          | 4                               | 2375                                    | 437.4                        | 18.4                                         | Oil Type                      | HOOPS                      |                 |
|                                 |            | 2                               | 3                                       | 1650                         | 369                                          | 22.4                          | Ohmsett Test Number / Date | 12.06 - Test 10 |
|                                 |            | 3                               | 4                                       | 2140                         | 280.8                                        | 13.1                          | Speed (knots)              | 0.12            |
|                                 |            | 4                               | 2                                       | 1000                         | 81.4                                         | 8.1                           | Bridge Spacing (feet)      | 11              |
|                                 |            | Untreated -PU                   | 1                                       | 760                          | 0                                            | 0.0                           | Post Oil Drag              | 0'              |
|                                 |            |                                 |                                         |                              |                                              |                               | Nozzle Configuration       | 6 x .042"       |
|                                 |            |                                 |                                         |                              |                                              | Duration (min)                | 11.88                      |                 |
|                                 |            |                                 |                                         |                              |                                              | Flow Rate (gpm)               | 1.02                       |                 |
|                                 |            |                                 |                                         |                              |                                              | Pump Pressure (psi)           | 80                         |                 |
|                                 |            |                                 |                                         |                              |                                              | Tank Initial / Final (inches) | 1.784 / 1.446              |                 |
|                                 |            |                                 |                                         |                              |                                              | Total                         | Treated - PU               | 13              |
|                                 |            |                                 |                                         |                              |                                              |                               |                            |                 |



**Table S3.**

| Test Number and Type            | Row/Sample    | Number of Foam Pads in each Row | Total Volume Collected (Oil+Water) (mL) | Volume of Oil Collected (mL) | Selectivity Ratio of Oil to Total Volume (%) | Testing Parameters         |                 |
|---------------------------------|---------------|---------------------------------|-----------------------------------------|------------------------------|----------------------------------------------|----------------------------|-----------------|
| Test 4<br>HOOPS<br>Polyurethane | 1             | 4                               | 6850                                    | 779                          | 11.4                                         | Oil Type                   | HOOPS           |
|                                 | 2             | 3                               |                                         |                              |                                              | Ohmsett Test Number / Date | 12.06 - Test 11 |
|                                 | 3             | 4                               |                                         |                              |                                              | Speed (knots)              | 0.2             |
|                                 | 4             | 2                               |                                         |                              |                                              | Bridge Spacing (feet)      | 15/11           |
|                                 | Untreated -PU | 1                               | 850                                     | 0                            | 0.0                                          | Post Oil Drag              | 0'              |
|                                 |               |                                 |                                         |                              |                                              | Nozzle Configuration       | 6 x .042"       |
|                                 |               |                                 |                                         |                              | Duration (min)                               | 9.9                        |                 |
|                                 |               |                                 |                                         |                              | Flow Rate (gpm)                              | 1.19                       |                 |
|                                 |               |                                 |                                         |                              | Pump Pressure (psi)                          | 80                         |                 |
|                                 |               |                                 |                                         |                              | Tank Initial / Final (inches)                | 1.452 / 1.123              |                 |
| Total                           | Treated - PU  | 13                              | 6850                                    | 779                          | 11.4                                         |                            |                 |
|                                 |               |                                 |                                         |                              |                                              |                            |                 |
| Test 5<br>HOOPS<br>Polyurethane | 1             | 4                               | 1490                                    | 218.4                        | 14.7                                         | Oil Type                   | HOOPS           |
|                                 | 2             | 3                               | 2600                                    | 160                          | 6.2                                          | Ohmsett Test Number / Date | 12.07 - Test 12 |
|                                 | 3             | 4                               | 1725                                    | 168                          | 9.7                                          | Speed (knots)              | 0.2             |
|                                 | 4             | 2                               | 840                                     | 121.5                        | 14.5                                         | Bridge Spacing (feet)      | 11              |
|                                 | Untreated -PU | 1                               | 795                                     | 15                           | 1.9                                          | Post Oil Drag              | 30 sec          |
|                                 |               |                                 |                                         |                              |                                              | Nozzle Configuration       | 8 x .042"       |
|                                 |               |                                 |                                         |                              | Duration (min)                               | 7.63                       |                 |
|                                 |               |                                 |                                         |                              | Flow Rate (gpm)                              | 1.65                       |                 |
|                                 |               |                                 |                                         |                              | Pump Pressure (psi)                          | 80                         |                 |
|                                 |               |                                 |                                         |                              | Tank Initial / Final (inches)                | 2.513 / 2.16               |                 |
| Total                           | Treated - PU  | 13                              | 6655                                    | 667.9                        | 11.3                                         |                            |                 |
|                                 |               |                                 |                                         |                              |                                              |                            |                 |
| Test 6<br>HOOPS<br>Polyurethane | 1             | 4                               | 1650                                    | 296.5                        | 18.0                                         | Oil Type                   | HOOPS           |
|                                 | 2             | 3                               | 1275                                    | 240                          | 18.8                                         | Ohmsett Test Number / Date | 12.07 - Test 13 |
|                                 | 3             | 4                               | 1800                                    | 304                          | 16.9                                         | Speed (knots)              | 0.2             |
|                                 | 4             | 2                               | 840                                     | 100                          | 11.9                                         | Bridge Spacing (feet)      | 11              |
|                                 | Untreated -PU | 1                               | 880                                     | 5                            | 0.6                                          | Post Oil Drag              |                 |
|                                 |               |                                 |                                         |                              |                                              | Nozzle Configuration       | 8 x .042"       |
|                                 |               |                                 |                                         |                              | Duration (min)                               | 8.82                       |                 |
|                                 |               |                                 |                                         |                              | Flow Rate (gpm)                              | 1.36                       |                 |
|                                 |               |                                 |                                         |                              | Pump Pressure (psi)                          | 80                         |                 |
|                                 |               |                                 |                                         |                              | Tank Initial / Final (inches)                | 2.16 / 1.824               |                 |
| Total                           | Treated - PU  | 13                              | 5565                                    | 940.5                        | 16.4                                         |                            |                 |

| Test Number and Type                                      | Row/Sample     | Number of Foam Pads in each Row | Total Volume Collected (Oil+Water) (mL) | Volume of Oil Collected (mL) | Selectivity Ratio of Oil to Total Volume (%) | Testing Parameters         |                       |      |
|-----------------------------------------------------------|----------------|---------------------------------|-----------------------------------------|------------------------------|----------------------------------------------|----------------------------|-----------------------|------|
| Test 7<br>HOOPS<br>Polyurethane<br>Polyimide<br>PIG       | 1 - PU         | 4                               | 1575                                    | 336                          | 21.3                                         | Oil Type                   | HOOPS                 |      |
|                                                           | 2 - PU         | 3                               | 1275                                    | 262.2                        | 20.6                                         | Ohmsett Test Number / Date | 12.07 - Test 14       |      |
|                                                           | 4 - PU         | 2                               | 815                                     | 10                           | 1.2                                          | Speed (knots)              | 0.2                   |      |
|                                                           | 3 - PIG        | 1                               | 420                                     | 136.5                        | 32.5                                         | Bridge Spacing (feet)      | 11                    |      |
|                                                           | 3 - Polyimide  | 3                               | 3425                                    | 1084.6                       | 31.7                                         | Post Oil Drag              |                       |      |
|                                                           | Untreated - PU | 1                               | 610                                     | 10                           | 1.6                                          | Nozzle Configuration       | 8 x .042"             |      |
|                                                           |                |                                 |                                         |                              |                                              | Duration (min)             | 8.92                  |      |
| Total                                                     | All Treated    | 13                              | 7510                                    | 1829.3                       | 21.5                                         | Flow Rate (gpm)            | 1.43                  |      |
|                                                           | Polyurethane   | 9                               | 3665                                    | 608.2                        | 14.4                                         | Pump Pressure (psi)        | 80                    |      |
|                                                           | Polyimide      | 3                               | 420                                     | 136.5                        | 32.5                                         | Tank Initial (inches)      | 1.826                 |      |
|                                                           | PIG            | 1                               | 270                                     | 136.5                        | 32.5                                         | Tank Final (inches)        | 1.47                  |      |
|                                                           |                |                                 |                                         |                              |                                              |                            |                       |      |
| Test 8<br>Diesel Fuel<br>Polyurethane<br>Polyimide<br>PIG | 1 - PU         | 4                               | 1400                                    | 317.5                        | 22.7                                         | Oil Type                   | DIESEL                |      |
|                                                           | 2 - PU         | 3                               | 1050                                    | 121.8                        | 11.6                                         | Ohmsett Test Number / Date | 12.08 - Test 15       |      |
|                                                           | 4 - PU         | 2                               | 710                                     | 50                           | 7.0                                          | Speed (knots)              | 0.2                   |      |
|                                                           | 3 - PIG        | 1                               | 220                                     | 20                           | 9.1                                          | Bridge Spacing (feet)      | 11                    |      |
|                                                           | 3 - PI         | 3                               | 2325                                    | 69.4                         | 3.0                                          | Post Oil Drag              |                       |      |
|                                                           | Untreated - PU | 1                               | 440                                     | 5                            | 1.1                                          | Nozzle Configuration       | 8 x .042"             |      |
|                                                           |                |                                 |                                         |                              |                                              | Duration (min)             | 9.32                  |      |
| Total                                                     | Treated - PU   | 9                               | 3160                                    | 489.3                        | 13.8                                         | Flow Rate (gpm)            | 1.3                   |      |
|                                                           |                |                                 |                                         |                              |                                              | Pump Pressure (psi)        | 80                    |      |
|                                                           |                |                                 |                                         |                              |                                              |                            |                       |      |
| Test 9<br>ANS<br>Polyurethane<br>Polyimide<br>PIG         | 1 - PU         | 4                               | 1915                                    | 375                          | 19.6                                         | Oil Type                   | ANS                   |      |
|                                                           | 2 - PU         | 3                               | 1450                                    | 324                          | 22.3                                         | Ohmsett Test Number / Date | 12.08 - Test 16       |      |
|                                                           | 3 - PU         | 2                               | 840                                     | 214.6                        | 25.5                                         | Speed (knots)              | 0.2                   |      |
|                                                           | 4 - PU         | 2                               | 900                                     | 270                          | 30.0                                         | Bridge Spacing (feet)      | 11                    |      |
|                                                           | 3 - PIG        | 1                               | 250                                     | 50                           | 20.0                                         | Post Oil Drag              |                       |      |
|                                                           | 3 - PI         | 1                               | 900                                     | 55                           | 6.1                                          | Nozzle Configuration       | 8 x .042"             |      |
|                                                           | Untreated - PU | 1                               | 600                                     | 5                            | 0.8                                          | Duration (min)             | 9.02                  |      |
|                                                           |                |                                 |                                         |                              |                                              | Flow Rate (gpm)            | 0.96                  |      |
|                                                           | Total          | Treated - PU                    | 11                                      | 5105                         | 1183.6                                       | 24.4                       | Pump Pressure (psi)   | 80   |
|                                                           |                |                                 |                                         |                              |                                              |                            | Tank Initial (inches) | 3.43 |
|                                                           |                |                                 |                                         |                              |                                              |                            |                       |      |
|                                                           |                |                                 |                                         |                              |                                              |                            |                       |      |

| Test Number and Type                               | Row/Sample   | Number of Foam Pads in each Row | Total Volume Collected (Oil+Water) (mL) | Volume of Oil Collected (mL) | Selectivity Ratio of Oil to Total Volume (%) | Testing Parameters         |                 |
|----------------------------------------------------|--------------|---------------------------------|-----------------------------------------|------------------------------|----------------------------------------------|----------------------------|-----------------|
| Test 10<br>ANS<br>Polyurethane<br>Polyimide<br>PIG | 1 - PU       | 4                               | 1250                                    | 390.5                        | 31.2                                         | Oil Type                   | ANS             |
|                                                    | 2 - PU       | 3                               | 1550                                    | 365                          | 23.5                                         | Ohmsett Test Number / Date | 12.08 - Test 17 |
|                                                    |              |                                 |                                         |                              |                                              | Speed (knots)              | 0.2             |
|                                                    | 3 - PU       | 2                               | 940                                     | 181.7                        | 19.3                                         | Bridge Spacing (feet)      | 11              |
|                                                    |              |                                 |                                         |                              |                                              | Post Oil Drag              |                 |
|                                                    | 4 - PU       | 2                               | 780                                     | 171.6                        | 22.0                                         | Nozzle Configuration       | 8 x .042"       |
|                                                    |              |                                 |                                         |                              |                                              | Duration (min)             | 10.98           |
|                                                    | 3 - PIG      | 1                               | 130                                     | 10                           | 7.7                                          | Flow Rate (gpm)            | 1.27            |
|                                                    |              |                                 |                                         |                              |                                              | Pump Pressure (psi)        | 80              |
|                                                    | 3 - PI       | 1                               | 820                                     | 68                           | 8.3                                          | Tank Initial (inches)      | 3.178           |
| Tank Final (inches)                                |              |                                 |                                         |                              |                                              | 2.787                      |                 |
| Untreated - PU                                     | 1            | 520                             | 10                                      | 1.9                          |                                              |                            |                 |
| Total                                              | Treated - PU | 11                              | 4520                                    | 1108.8                       | 24.0                                         |                            |                 |
|                                                    |              |                                 |                                         |                              |                                              |                            |                 |
| Test 11<br>ANS<br>Polyurethane<br>Polyimide<br>PIG | 1 - PU       | 4                               | 1550                                    | 148.5                        | 9.6                                          | Oil Type                   | ANS             |
|                                                    | 2 - PU       | 3                               | 1225                                    | 105                          | 8.6                                          | Ohmsett Test Number / Date | 12.08 - Test 18 |
|                                                    |              |                                 |                                         |                              |                                              | Speed (knots)              | 0.1             |
|                                                    | 3 - PU       | 2                               | 760                                     | 75                           | 9.9                                          | Bridge Spacing (feet)      | 11              |
|                                                    |              |                                 |                                         |                              |                                              | Post Oil Drag              |                 |
|                                                    | 4 - PU       | 2                               | 625                                     | 75                           | 12.0                                         | Nozzle Configuration       | 8 x .042"       |
|                                                    |              |                                 |                                         |                              |                                              | Duration (min)             | 7.73            |
|                                                    | 3 - PIG      | 1                               | 125                                     | 10                           | 8.0                                          | Flow Rate (gpm)            | 1.51            |
|                                                    |              |                                 |                                         |                              |                                              | Pump Pressure (psi)        | 80              |
|                                                    | 3 - PI       | 1                               | 830                                     | 100                          | 12.0                                         | Tank Initial (inches)      | 2.787           |
| Tank Final (inches)                                |              |                                 |                                         |                              |                                              | 2.46                       |                 |
| Untreated - PU                                     | 1            | 625                             | 10                                      | 1.6                          |                                              |                            |                 |
| Total                                              | Treated - PU | 11                              | 4160                                    | 403.5                        | 10.0                                         |                            |                 |
|                                                    |              |                                 |                                         |                              |                                              |                            |                 |
| Test 12<br>ANS<br>Polyurethane<br>Polyimide<br>PIG | 1 - PU       | 4                               | 1725                                    | 80                           | 4.6                                          | Oil Type                   | ANS             |
|                                                    | 2 - PU       | 3                               | 1290                                    | 62.5                         | 4.8                                          | Ohmsett Test Number / Date | 12.09 - Test 19 |
|                                                    |              |                                 |                                         |                              |                                              | Speed (knots)              | 0.1             |
|                                                    | 3 - PU       | 2                               | 825                                     | 90                           | 10.9                                         | Bridge Spacing (feet)      | 11              |
|                                                    |              |                                 |                                         |                              |                                              | Post Oil Drag              | 30 sec          |
|                                                    | 4 - PU       | 2                               | 740                                     | 55                           | 7.4                                          | Nozzle Configuration       | 8 x .042"       |
|                                                    |              |                                 |                                         |                              |                                              | Duration (min)             | 8.55            |
|                                                    | 3 - PIG      | 1                               | 160                                     | 10                           | 6.3                                          | Flow Rate (gpm)            | 1.49            |
|                                                    |              |                                 |                                         |                              |                                              | Pump Pressure (psi)        | 80              |
|                                                    | 3 - PI       | 1                               | 810                                     | 40                           | 4.9                                          | Tank Initial (inches)      | 2.451           |
| Tank Final (inches)                                |              |                                 |                                         |                              |                                              | 2.095                      |                 |
| Untreated - PU                                     | 1            | 820                             | 10                                      | 1.2                          |                                              |                            |                 |
| Total                                              | Treated - PU | 11                              | 4580                                    | 287.5                        | 7.0                                          |                            |                 |

| Test Number and Type                               | Row/Sample   | Number of Foam Pads in each Row | Total Volume Collected (Oil+Water) (mL) | Volume of Oil Collected (mL) | Selectivity Ratio of Oil to Total Volume (%) | Testing Parameters         |                 |
|----------------------------------------------------|--------------|---------------------------------|-----------------------------------------|------------------------------|----------------------------------------------|----------------------------|-----------------|
| Test 10<br>ANS<br>Polyurethane<br>Polyimide<br>PIG | 1 - PU       | 4                               | 1250                                    | 390.5                        | 31.2                                         | Oil Type                   | ANS             |
|                                                    | 2 - PU       | 3                               | 1550                                    | 365                          | 23.5                                         | Ohmsett Test Number / Date | 12.08 - Test 17 |
|                                                    |              |                                 |                                         |                              |                                              | Speed (knots)              | 0.2             |
|                                                    | 3 - PU       | 2                               | 940                                     | 181.7                        | 19.3                                         | Bridge Spacing (feet)      | 11              |
|                                                    |              |                                 |                                         |                              |                                              | Post Oil Drag              |                 |
|                                                    | 4 - PU       | 2                               | 780                                     | 171.6                        | 22.0                                         | Nozzle Configuration       | 8 x .042"       |
|                                                    |              |                                 |                                         |                              |                                              | Duration (min)             | 10.98           |
|                                                    | 3 - PIG      | 1                               | 130                                     | 10                           | 7.7                                          | Flow Rate (gpm)            | 1.27            |
|                                                    |              |                                 |                                         |                              |                                              | Pump Pressure (psi)        | 80              |
|                                                    | 3 - PI       | 1                               | 820                                     | 68                           | 8.3                                          | Tank Initial (inches)      | 3.178           |
| Tank Final (inches)                                |              |                                 |                                         |                              |                                              | 2.787                      |                 |
| Untreated - PU                                     | 1            | 520                             | 10                                      | 1.9                          |                                              |                            |                 |
| Total                                              | Treated - PU | 11                              | 4520                                    | 1108.8                       | 24.0                                         |                            |                 |
|                                                    |              |                                 |                                         |                              |                                              |                            |                 |
| Test 11<br>ANS<br>Polyurethane<br>Polyimide<br>PIG | 1 - PU       | 4                               | 1550                                    | 148.5                        | 9.6                                          | Oil Type                   | ANS             |
|                                                    | 2 - PU       | 3                               | 1225                                    | 105                          | 8.6                                          | Ohmsett Test Number / Date | 12.08 - Test 18 |
|                                                    |              |                                 |                                         |                              |                                              | Speed (knots)              | 0.1             |
|                                                    | 3 - PU       | 2                               | 760                                     | 75                           | 9.9                                          | Bridge Spacing (feet)      | 11              |
|                                                    |              |                                 |                                         |                              |                                              | Post Oil Drag              |                 |
|                                                    | 4 - PU       | 2                               | 625                                     | 75                           | 12.0                                         | Nozzle Configuration       | 8 x .042"       |
|                                                    |              |                                 |                                         |                              |                                              | Duration (min)             | 7.73            |
|                                                    | 3 - PIG      | 1                               | 125                                     | 10                           | 8.0                                          | Flow Rate (gpm)            | 1.51            |
|                                                    |              |                                 |                                         |                              |                                              | Pump Pressure (psi)        | 80              |
|                                                    | 3 - PI       | 1                               | 830                                     | 100                          | 12.0                                         | Tank Initial (inches)      | 2.787           |
| Tank Final (inches)                                |              |                                 |                                         |                              |                                              | 2.46                       |                 |
| Untreated - PU                                     | 1            | 625                             | 10                                      | 1.6                          |                                              |                            |                 |
| Total                                              | Treated - PU | 11                              | 4160                                    | 403.5                        | 10.0                                         |                            |                 |
|                                                    |              |                                 |                                         |                              |                                              |                            |                 |
| Test 12<br>ANS<br>Polyurethane<br>Polyimide<br>PIG | 1 - PU       | 4                               | 1725                                    | 80                           | 4.6                                          | Oil Type                   | ANS             |
|                                                    | 2 - PU       | 3                               | 1290                                    | 62.5                         | 4.8                                          | Ohmsett Test Number / Date | 12.09 - Test 19 |
|                                                    |              |                                 |                                         |                              |                                              | Speed (knots)              | 0.1             |
|                                                    | 3 - PU       | 2                               | 825                                     | 90                           | 10.9                                         | Bridge Spacing (feet)      | 11              |
|                                                    |              |                                 |                                         |                              |                                              | Post Oil Drag              | 30 sec          |
|                                                    | 4 - PU       | 2                               | 740                                     | 55                           | 7.4                                          | Nozzle Configuration       | 8 x .042"       |
|                                                    |              |                                 |                                         |                              |                                              | Duration (min)             | 8.55            |
|                                                    | 3 - PIG      | 1                               | 160                                     | 10                           | 6.3                                          | Flow Rate (gpm)            | 1.49            |
|                                                    |              |                                 |                                         |                              |                                              | Pump Pressure (psi)        | 80              |
|                                                    | 3 - PI       | 1                               | 810                                     | 40                           | 4.9                                          | Tank Initial (inches)      | 2.451           |
| Tank Final (inches)                                |              |                                 |                                         |                              |                                              | 2.095                      |                 |
| Untreated - PU                                     | 1            | 820                             | 10                                      | 1.2                          |                                              |                            |                 |
| Total                                              | Treated - PU | 11                              | 4580                                    | 287.5                        | 7.0                                          |                            |                 |
|                                                    |              |                                 |                                         |                              |                                              |                            |                 |

## Supplementary Movie Captions.

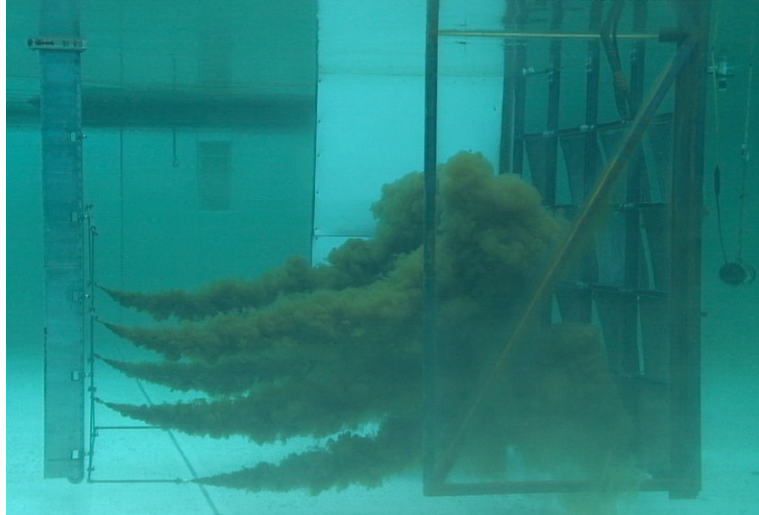

**Movie S1. Oil plume – side view.** Oil plume (HOOPS crude), as viewed underwater from the side, perpendicular to the direction of travel during the test. The distance between nozzles and frame was 10 feet. Video sped up by 8 $\times$ .

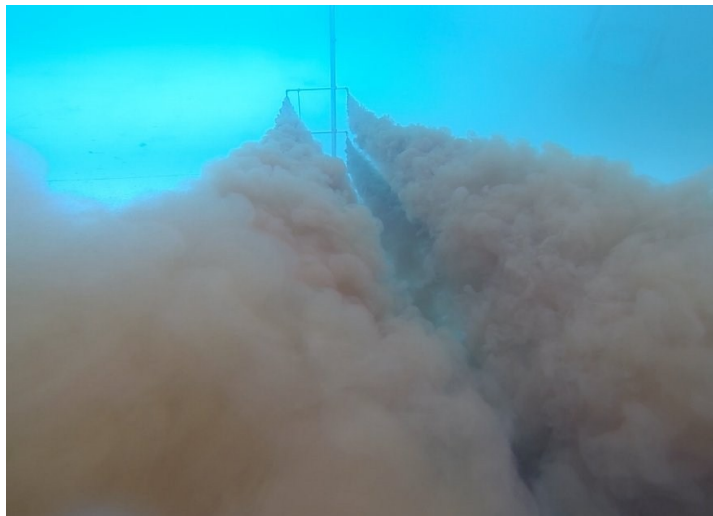

**Movie S3. Oil plume frame view – orientation 1.** Oil plume (ANS crude) as viewed underwater with the camera situated directly next to the foam pad frame. Movie is shown in real-time.

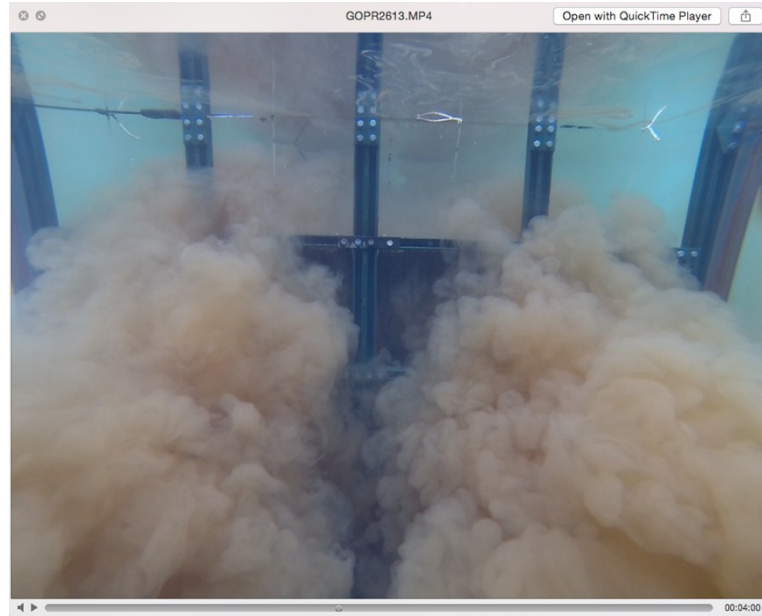

**Movie S3. Oil plume frame view – orientation 2.** Oil plume (HOOPS crude), as viewed from a position in front of the frame. Video is shown in real time.
